# Supplementary material for: Simultaneous determination of polybrominated diphenyl ethers, polycyclic aromatic hydrocarbons and their hydroxylated metabolites in human hair: a potential methodology to distinguish external from internal exposure
Source: Royal Society of Chemistry journal article supplement (doi:10.1039/c9an01359h), 2019-01-01
Supplement: c9an01359h1.pdf [file c9an01359h1.pdf]

## Supplementary Material

### **Simultaneous determination of polybrominated diphenyl ethers, polycyclic aromatic hydrocarbons and their hydroxylated metabolites in human hair: A potential methodology to distinguish external from internal exposure**

Meiqing Lin <sup>a,b,c</sup>, Jian Tang <sup>a</sup>, Shengtao Ma <sup>a</sup>, Yingxin Yu <sup>a</sup>, Guiying Li <sup>a</sup>, Bixian Mai <sup>b</sup>,  
Ruifang Fan <sup>d</sup>, Taicheng An <sup>a,\*</sup>

<sup>a</sup> *Guangdong Key Laboratory of Environmental Catalysis and Health Risk Control, Guangzhou Key Laboratory of Environmental Catalysis and Pollution Control, School of Environmental Science and Engineering, Institute of Environmental Health and Pollution Control, Guangdong University of Technology, Guangzhou 510006, China*

<sup>b</sup> *State Key Laboratory of Organic Geochemistry, Guangzhou Institute of Geochemistry, Chinese Academy of Sciences, Guangzhou, 510640 Guangdong, China*

<sup>c</sup> *University of Chinese Academy of Sciences, Beijing 100049, China*

<sup>d</sup> *Guangdong Provincial Engineering Technology Research Center for Drug and Food Biological Resources Processing and Comprehensive Utilization, School of Life Sciences, South China Normal University, 510631, China*

\* Corresponding author: Prof. Taicheng An, E-mail: [antc99@gdut.edu.cn](mailto:antc99@gdut.edu.cn).

## **Contents of this file**

**Table S1** General demographic characteristics of the hair donors who participated in the present study

**Table S2** Parameters of GC-MS-MS analysis for PAHs in human hair

**Table S3** Parameters of LC-MS-MS analysis for OH-PAHs in human hair

**Table S4** Validation parameters of the analytical method

**Table S5** Concentrations of PBDEs in hair samples ( $\text{ng g}^{-1}$  dw)

**Table S6** Concentrations of PAHs in the hair ( $\text{ng g}^{-1}$  dw)

**Table S7** Concentrations of OH-PAHs in the hair ( $\text{ng g}^{-1}$  dw)

**Table S8** Spearman correlation coefficients between different classes of compound concentrations and lipid content

**Table S9** Spearman correlation coefficients between OH-PAHs and the two parent compounds

**Fig. S1** Loading plot of PLS-DA

**Table S1** General demographic characteristics of the hair donors who participated in the present study

|                            | <b>n</b> | <b>Age<br/>(years)</b> | <b>Height<br/>(cm)</b> | <b>Weight<br/>(kg)</b> | <b>BMI<br/>(kg m<sup>-2</sup>)</b> | <b>Hair internal<br/>lipid content (%)</b> | <b>Hair external<br/>lipid content (%)</b> |
|----------------------------|----------|------------------------|------------------------|------------------------|------------------------------------|--------------------------------------------|--------------------------------------------|
| E-waste dismantling worker | 10       | 41 (26–52)             | 165<br>(150–180)       | 65 (53–85)             | 24 (22–26)                         | 0.9 (0.5–1.6)                              | 1.5 (0.6–2.4)                              |
| Resident                   | 10       | 52 (45–61)             | 167<br>(160–174)       | 71 (62–80)             | 25 (22–29)                         | 0.6 (0.2–0.9)                              | 3 (0.7–10)                                 |

BMI: body mass index.

**Table S2** Parameters of GC-MS-MS analysis for PAHs in human hair

| <b>Compound name</b>         | <b>Analyte</b>      | <b>Transition 1</b> | <b>Collision</b>   | <b>Transition 1</b> | <b>Collision</b>   | <b>Retention time</b> |
|------------------------------|---------------------|---------------------|--------------------|---------------------|--------------------|-----------------------|
|                              | <b>abbreviation</b> | <b>(m/z)</b>        | <b>energy (eV)</b> | <b>(m/z)</b>        | <b>energy (eV)</b> | <b>(min)</b>          |
| Naphthalene-d <sub>8</sub>   | Nap-d <sub>8</sub>  | 136→108             | 15                 |                     | 15                 | 6.615                 |
| Naphthalene                  | Nap                 | 128→102             | 15                 | 128→78              | 15                 | 6.660                 |
| Hexamethylbenzene            | HMB                 | 147→119             | 15                 |                     | 15                 | 10.204                |
| Acenaphthylene               | Acy                 | 152→151             | 15                 | 152→126             | 15                 | 10.280                |
| Acenaphthene-d <sub>10</sub> | Ace-d <sub>10</sub> | 164→162             | 15                 |                     | 15                 | 10.625                |
| Acenaphthene                 | Ace                 | 154→153             | 15                 | 154→152             | 15                 | 10.701                |
| Fluorene                     | Flu                 | 166→165             | 15                 | 165→164             | 15                 | 11.939                |
| Phenanthrene-d <sub>10</sub> | Phe-d <sub>10</sub> | 188→160             | 15                 |                     | 15                 | 14.294                |
| Phenanthrene                 | Phe                 | 178→152             | 15                 | 178→176             | 15                 | 14.361                |
| Anthracene                   | Ant                 | 178→152             | 15                 | 178→176             | 15                 | 14.518                |
| Fluoranthene                 | Flua                | 202→200             | 15                 | 101→88              | 15                 | 19.007                |
| Pyrene                       | Pyr                 | 202→201             | 15                 | 101→88              | 15                 | 20.133                |
| Benz[a]anthracene            | B[a]A               | 228→226             | 15                 | 226→224             | 15                 | 28.627                |
| Chrysene-d <sub>12</sub>     | Chr-d <sub>12</sub> | 240→236             | 15                 |                     | 15                 | 28.675                |
| Chrysene                     | Chr                 | 228→226             | 15                 | 228→202             | 15                 | 28.883                |
| Benzo[b]fluoranthene         | B[b]F               | 252→250             | 15                 | 250→248             | 15                 | 37.857                |
| Benzo[k]fluoranthene         | B[k]F               | 252→250             | 15                 | 126→113             | 15                 | 38.111                |
| Benzo[a]pyrene               | B[a]P               | 252→250             | 15                 | 250→248             | 15                 | 40.512                |
| Perylene-d <sub>12</sub>     | Per-d <sub>12</sub> | 264→260             | 15                 |                     | 15                 | 41.016                |
| Indeno[1,2,3-cd]pyrene       | InP                 | 276→274             | 15                 | 138→137             | 15                 | 47.353                |
| Dibenz[a,h]anthracene        | D[a,h]A             | 278→276             | 15                 | 276→274             | 15                 | 47.622                |
| Benzo[ghi]perylene           | B[ghi]P             | 276→274             | 15                 | 138→137             | 15                 | 48.308                |

**Table S3** Parameters of LC-MS-MS analysis for OH-PAHs in human hair

| Compound name                                       | Analyte abbreviation                   | MRM (m/z) | Fragmentor | Collision energy | Retention time |
|-----------------------------------------------------|----------------------------------------|-----------|------------|------------------|----------------|
|                                                     |                                        |           | (eV)       | (eV)             | (min)          |
| 2-Hydroxynaphthalene-d <sub>7</sub>                 | 2-OH-Nap-d <sub>7</sub>                | 150→122   | 160        | 34               | 8.256          |
| 2-Hydroxynaphthalene                                | 2-OH-Nap                               | 143→115   | 140        | 30               | 8.433          |
| 1-Hydroxynaphthalene                                | 1-OH-Nap                               | 143→115   | 140        | 28               | 9.013          |
| 2-Hydroxyfluoren-d <sub>9</sub>                     | 2-OH-Flu-d <sub>9</sub>                | 190→188   | 140        | 30               | 11.387         |
| 3-Hydroxyfluoren                                    | 3-OH-Flu                               | 181→153   | 110        | 20               | 11.487         |
| 2-Hydroxyfluoren                                    | 2-OH-Flu                               | 181→180   | 120        | 25               | 11.609         |
| 2-Hydroxyphenanthrene                               | 2-OH-Phe                               | 193→165   | 170        | 34               | 12.370         |
| 3-Hydroxyphenanthrene                               | 3-OH-Phe                               | 193→165   | 160        | 34               | 12.514         |
| <sup>13</sup> C <sub>6</sub> -3-Hydroxyphenanthrene | <sup>13</sup> C <sub>6</sub> -3-OH-Phe | 199→171   | 160        | 34               | 12.513         |
| 1/9-Hydroxyphenanthrene                             | 1/9-OH-Phe                             | 193→165   | 170        | 34               | 13.003         |
| 4-Hydroxyphenanthrene                               | 4-OH-Phe                               | 193→165   | 170        | 34               | 13.329         |
| 1-hydroxypyrene-d <sub>9</sub>                      | 1-OH-Pyr-d <sub>9</sub>                | 226→198   | 200        | 42               | 14.725         |
| 1-hydroxypyrene                                     | 1-OH-Pyr                               | 217→189   | 170        | 40               | 14.953         |
| 2'-hydroxy-2,4,4'-tribromodiphenyl ether            | 2'-OH-BDE-28                           | 421→79    | 90         | 13               | 7.762          |
| 6-hydroxy-2,2',4,4'-tetrabromodiphenyl ether        | 6-OH-BDE-47                            | 501→79    | 110        | 21               | 9.798          |
| 6'-hydroxy-2,2',4,4'-pentabromodiphenyl ether       | 6'-OH-BDE-99                           | 579→79    | 110        | 17               | 13.182         |
| 3'-hydroxy-2,2',4,4'-hexabromodiphenyl ether        | 3'-OH-BDE-154                          | 659→79    | 180        | 50               | 14.421         |

**Table S4** Validation parameters of the analytical method

| Compounds | LOD (pg) | LOQ (pg) | Spiked mass (ng) |            | Recovery (%) (n=3) |            | Accuracy (%) (n=6) |           | RSD (%) (n=6) |           |
|-----------|----------|----------|------------------|------------|--------------------|------------|--------------------|-----------|---------------|-----------|
|           |          |          | Low level        | High Level | Low level          | High level | Intra-day          | Inter-day | Intra-day     | Inter-day |
|           |          |          | BDE-17           | 0.05       | 0.2                | 0.5        | 4                  | 109.9     | 104.0         | 99.9      |
| BDE-28    | 0.05     | 0.15     | 0.5              | 4          | 93.7               | 106.7      | 100.5              | 99.1      | 4.5           | 18.6      |
| BDE-71    | 0.05     | 0.15     | 0.5              | 4          | 94.3               | 89.9       | 95.2               | 100.8     | 3.1           | 4.3       |
| BDE-47    | 0.05     | 0.15     | 0.5              | 4          | 132.8              | 98.5       | 99.7               | 98.2      | 3.8           | 5.9       |
| BDE-66    | 0.05     | 0.2      | 0.5              | 4          | 145.3              | 94.3       | 101.2              | 100.5     | 4.2           | 4.3       |
| BDE-100   | 0.05     | 0.15     | 0.5              | 4          | 99.3               | 97.7       | 95.6               | 98.0      | 4.6           | 7.7       |
| BDE-99    | 0.05     | 0.15     | 0.5              | 4          | 94.9               | 104.9      | 95.0               | 97.0      | 6.0           | 6.2       |
| BDE-85    | 0.05     | 0.15     | 0.5              | 4          | 121.1              | 106.6      | 98.0               | 98.6      | 7.4           | 10.8      |
| BDE-154   | 0.05     | 0.2      | 0.5              | 4          | 110.5              | 110.0      | 92.0               | 97.8      | 6.1           | 7.6       |
| BDE-153   | 0.05     | 0.15     | 0.5              | 4          | 104.6              | 125.4      | 93.5               | 97.0      | 7.0           | 12.3      |
| BDE-138   | 0.05     | 0.15     | 0.5              | 4          | 113.9              | 102.4      | 89.5               | 98.9      | 8.2           | 10.7      |
| BDE-183   | 0.05     | 0.20     | 0.5              | 4          | 97.8               | 102.5      | 93.9               | 96.5      | 8.5           | 8.5       |
| BDE-190   | 0.10     | 0.5      | 0.5              | 4          | 104.6              | 97.0       | 84.3               | 97.5      | 9.5           | 8.7       |
| BDE-197   | 0.08     | 0.2      | 2.5              | 20         | 103.4              | 106.4      | 114.7              | 99.2      | 11.3          | 17.0      |
| BDE-203   | 0.1      | 0.25     | 2.5              | 20         | 89.2               | 93.2       | 98.0               | 99.1      | 7.6           | 12.7      |
| BDE-196   | 0.1      | 0.25     | 2.5              | 20         | 82.6               | 91.7       | 108.3              | 98.6      | 8.9           | 14.5      |
| BDE-208   | 0.2      | 0.4      | 2.5              | 20         | 92.9               | 87.1       | 106.7              | 98.8      | 8.3           | 9.2       |
| BDE-207   | 0.13     | 0.25     | 2.5              | 20         | 81.2               | 84.6       | 102.4              | 99.7      | 8.3           | 11.2      |
| BDE-206   | 0.25     | 0.5      | 2.5              | 20         | 68.9               | 62.0       | 103.3              | 98.6      | 4.7           | 4.8       |
| BDE-209   | 0.5      | 0.9      | 2.5              | 20         | 64.0               | 69.3       | 105.2              | 97.9      | 12.0          | 17.1      |
| Nap       | 0.05     | 0.1      | 5                | 40         | 48.4               | 56.8       | 50.2               | 66.8      | 18.7          | 24.5      |
| Acy       | 0.05     | 0.1      | 5                | 40         | 112.7              | 106.4      | 95.5               | 99.5      | 7.0           | 15.0      |
| Ace       | 0.05     | 0.1      | 5                | 40         | 111.6              | 101.0      | 98.6               | 99.6      | 6.6           | 14.0      |
| Flu       | 0.05     | 0.1      | 5                | 40         | 111.0              | 134.5      | 100.1              | 90.1      | 6.1           | 13.7      |
| Phe       | 0.8      | 1.5      | 5                | 40         | 120.6              | 85.0       | 100.3              | 99.2      | 12.1          | 8.3       |

|              |      |      |     |     |       |       |       |       |      |      |
|--------------|------|------|-----|-----|-------|-------|-------|-------|------|------|
| Ant          | 1    | 2    | 5   | 40  | 94.3  | 79.8  | 104.6 | 108.3 | 4.2  | 9.5  |
| Flua         | 0.5  | 1    | 5   | 40  | 97.8  | 81.2  | 95.5  | 100.6 | 9.2  | 16.3 |
| Pyr          | 0.1  | 0.5  | 5   | 40  | 98.3  | 83.4  | 101.0 | 100.9 | 7.8  | 18.2 |
| B[a]A        | 15   | 25   | 5   | 40  | 98.0  | 106.9 | 94.3  | 98.3  | 5.0  | 10.2 |
| Chr          | 15   | 25   | 5   | 40  | 94.4  | 105.6 | 95.1  | 98.3  | 5.5  | 10.5 |
| B[b]F        | 15   | 20   | 5   | 40  | 103.5 | 87.1  | 91.1  | 98.3  | 5.3  | 9.8  |
| B[k]F        | 15   | 20   | 5   | 40  | 97.2  | 83.4  | 90.2  | 96.4  | 4.6  | 9.7  |
| B[a]P        | 15   | 25   | 5   | 40  | 104.0 | 87.8  | 94.8  | 97.6  | 3.6  | 9.7  |
| D[a,h]A      | 15   | 20   | 5   | 40  | 96.7  | 111.8 | 105.6 | 104.6 | 5.8  | 11.6 |
| InP          | 15   | 20   | 5   | 40  | 93.7  | 105.6 | 98.8  | 97.2  | 4.7  | 17.1 |
| B[ghi]P      | 5    | 10   | 5   | 40  | 94.5  | 101.7 | 91.9  | 96.0  | 5.2  | 10.4 |
| 2-OH-Nap     | 2    | 5    | 25  | 200 | 128.0 | 102.7 | 109.4 | 100.0 | 9.2  | 13.8 |
| 1-OH-Nap     | 5    | 12.5 | 2.5 | 20  | 60.0  | 82.7  | 104.8 | 98.6  | 0.7  | 2.6  |
| 3-OH-Flu     | 25   | 50   | 2.5 | 20  | 109.9 | 111.4 | 116.1 | 102.1 | 3.5  | 19.5 |
| 2-OH-Flu     | 0.5  | 3    | 2.5 | 20  | 143.6 | 146.1 | 106.0 | 100.8 | 4.7  | 2.6  |
| 2-OH-Phe     | 0.3  | 0.8  | 2.5 | 20  | 103.3 | 77.2  | 101.9 | 97.8  | 4.7  | 8.6  |
| 3-OH-Phe     | 0.2  | 0.6  | 2.5 | 20  | 98.4  | 96.3  | 99.7  | 98.3  | 4.1  | 5.8  |
| 1/9-OH-Phe   | 0.3  | 1    | 2.5 | 20  | 77.0  | 81.8  | 97.6  | 98.7  | 4.3  | 17.8 |
| 4-OH-Phe     | 0.5  | 2    | 2.5 | 20  | 110.7 | 117.2 | 98.5  | 101.5 | 4.5  | 3.0  |
| 1-OH-Pyr     | 0.5  | 1    | 2.5 | 20  | 66.7  | 77.0  | 97.3  | 99.7  | 2.3  | 10.6 |
| 2'-OH-BDE28  | 0.05 | 0.2  | 2   | 20  | 74.6  | 78.3  | 95.3  | 80.6  | 4.4  | 2.6  |
| 6-OH-BDE47   | 0.05 | 0.2  | 2   | 20  | 70.6  | 86.3  | 95.6  | 88.0  | 9.5  | 7.5  |
| 6'-OH-BDE99  | 0.05 | 0.2  | 2   | 20  | 63.4  | 88.3  | 100.4 | 99.0  | 10.1 | 10.9 |
| 3'-OH-BDE154 | 0.15 | 0.5  | 2   | 20  | 60.2  | 85.0  | 97.7  | 94.4  | 5.6  | 7.2  |

**Table S5** Concentrations of PBDEs in hair samples (ng g<sup>-1</sup> dw)

| Compounds             | Resident (n=10) |       |        |            |          |      |        |            | Worker (n=10) |      |        |           |          |      |        |           |
|-----------------------|-----------------|-------|--------|------------|----------|------|--------|------------|---------------|------|--------|-----------|----------|------|--------|-----------|
|                       | Internal        |       |        |            | External |      |        |            | Internal      |      |        |           | External |      |        |           |
|                       | Mean            | SD    | Median | Range      | Mean     | SD   | Median | Range      | Mean          | SD   | Median | Range     | Mean     | SD   | Median | Range     |
| BDE-17                | 0.06            | 0.06  | 0.04   | 0.01-0.21  | 0.06     | 0.04 | 0.05   | 0.01-0.14  | 0.68          | 0.45 | 0.58   | 0.24-1.77 | 0.45     | 0.34 | 0.30   | 0.17-1.26 |
| BDE-28                | 0.26            | 0.28  | 0.18   | 0.06-1.03  | 0.29     | 0.21 | 0.21   | 0.05-0.63  | 4.31          | 2.87 | 3.27   | 1.42-9.84 | 2.50     | 1.71 | 1.72   | 0.79-6.26 |
| BDE-71                | 0.07            | 0.11  | 0.02   | 0.01-0.33  | 0.07     | 0.13 | 0.03   | 0.01-0.43  | 0.49          | 0.57 | 0.32   | 0.20-2.10 | 0.20     | 0.07 | 0.18   | 0.12-0.33 |
| BDE-47                | 0.47            | 0.40  | 0.35   | 0.09-1.36  | 0.65     | 0.51 | 0.48   | 0.12-1.57  | 7.14          | 2.95 | 6.79   | 3.29-12.9 | 5.86     | 2.40 | 5.51   | 3.20-11.4 |
| BDE-66                | 0.13            | 0.12  | 0.09   | 0.02-0.41  | 0.17     | 0.14 | 0.12   | 0.03-0.43  | 1.62          | 0.71 | 1.55   | 0.73-3.07 | 1.40     | 0.64 | 1.28   | 0.57-2.65 |
| BDE-100               | 0.02            | 0.01  | 0.02   | ND-0.04    | 0.05     | 0.03 | 0.03   | 0.02-0.08  | 0.30          | 0.30 | 0.17   | 0.03-1.03 | 0.35     | 0.21 | 0.30   | 0.10-0.73 |
| BDE-99                | 0.15            | 0.10  | 0.12   | 0.05-0.37  | 0.29     | 0.26 | 0.16   | 0.06-0.81  | 2.78          | 1.46 | 2.43   | 0.81-6.02 | 2.84     | 0.84 | 2.79   | 1.41-4.23 |
| BDE-85                | 0.008           | 0.007 | 0.008  | ND-0.02    | 0.02     | 0.02 | 0.01   | ND-0.04    | 0.12          | 0.06 | 0.11   | 0.04-0.25 | 0.13     | 0.03 | 0.13   | 0.07-0.19 |
| BDE-154               | 0.01            | 0.009 | 0.008  | 0.001-0.03 | 0.04     | 0.03 | 0.03   | 0.001-0.1  | 0.22          | 0.18 | 0.14   | 0.03-0.55 | 0.24     | 0.12 | 0.17   | 0.11-0.48 |
| BDE-153               | 0.03            | 0.02  | 0.02   | 0.01-0.08  | 0.12     | 0.11 | 0.06   | 0.02-0.31  | 0.49          | 0.35 | 0.38   | 0.10-1.11 | 0.64     | 0.27 | 0.51   | 0.35-1.05 |
| BDE-138               | 0.003           | 0.004 | ND     | ND-0.01    | 0.01     | 0.02 | 0.01   | ND-0.05    | 0.04          | 0.02 | 0.04   | 0.01-0.08 | 0.07     | 0.02 | 0.05   | 0.05-0.12 |
| BDE-183               | 0.04            | 0.05  | 0.02   | 0.002-0.18 | 0.26     | 0.31 | 0.10   | 0.02-1.00  | 0.49          | 0.55 | 0.22   | 0.06-1.55 | 0.99     | 0.73 | 0.85   | 0.20-2.38 |
| BDE-190               | 0.003           | 0.01  | ND     | ND-0.03    | 0.02     | 0.03 | ND     | ND-0.07    | 0.06          | 0.03 | 0.05   | 0.02-0.12 | 0.10     | 0.04 | 0.10   | 0.03-0.17 |
| BDE-197               | 0.01            | 0.02  | 0.003  | 0.002-0.06 | 0.05     | 0.06 | 0.01   | 0.002-0.13 | 0.27          | 0.19 | 0.20   | 0.08-0.70 | 0.19     | 0.13 | 0.16   | 0.05-0.45 |
| BDE-203               | 0.02            | 0.02  | 0.02   | 0.004-0.05 | 0.05     | 0.05 | 0.04   | 0.002-0.14 | 0.17          | 0.09 | 0.17   | 0.03-0.36 | 0.16     | 0.07 | 0.14   | 0.09-0.30 |
| BDE-196               | 0.07            | 0.17  | 0.01   | 0.003-0.56 | 0.05     | 0.05 | 0.04   | 0.003-0.13 | 0.26          | 0.15 | 0.25   | 0.07-0.60 | 0.17     | 0.08 | 0.14   | 0.10-0.33 |
| BDE-208               | 0.11            | 0.10  | 0.08   | 0.006-0.32 | 0.31     | 0.22 | 0.23   | 0.07-0.69  | 0.92          | 0.31 | 1.01   | 0.21-1.36 | 0.79     | 0.16 | 0.78   | 0.56-1.03 |
| BDE-207               | 0.17            | 0.14  | 0.13   | 0.02-0.47  | 0.46     | 0.32 | 0.35   | 0.12-1.02  | 1.45          | 0.50 | 1.54   | 0.34-2.28 | 1.31     | 0.26 | 1.28   | 0.98-1.78 |
| BDE-206               | 0.04            | 0.07  | 0.01   | 0.005-0.21 | 0.48     | 0.38 | 0.34   | 0.06-1.17  | 0.87          | 0.45 | 0.89   | 0.03-1.53 | 1.53     | 0.34 | 1.46   | 1.10-2.12 |
| BDE-209               | 4.22            | 4.02  | 2.36   | 0.78-12.5  | 16.4     | 14.1 | 11.6   | 3.98-48.9  | 48.5          | 20.2 | 52.5   | 5.32-74.2 | 63.3     | 8.24 | 64.39  | 49.0-74.8 |
| Σ <sub>20</sub> PBDEs | 5.90            | 4.72  | 4.23   | 1.31-15.4  | 19.9     | 16.6 | 13.5   | 4.68-57.1  | 71.2          | 26.7 | 76.5   | 16.8-106  | 83.2     | 12.7 | 84.8   | 61.4-106  |

SD: standard deviation.

ND: not detected



**Table S6** Concentrations of PAHs in the hair (ng g<sup>-1</sup> dw)

| Compounds            | Resident (n=10) |       |        |            |          |      |        |            | Worker (n=10) |      |        |           |          |      |        |           |
|----------------------|-----------------|-------|--------|------------|----------|------|--------|------------|---------------|------|--------|-----------|----------|------|--------|-----------|
|                      | Internal        |       |        |            | External |      |        |            | Internal      |      |        |           | External |      |        |           |
|                      | Mean            | SD    | Median | Range      | Mean     | SD   | Median | Range      | Mean          | SD   | Median | Range     | Mean     | SD   | Median | Range     |
| Nap                  | 5.62            | 2.33  | 6.38   | 2.31-8.24  | 6.13     | 4.16 | 6.17   | 0.62-12.0  | 11.5          | 3.00 | 11.4   | 5.43-15.4 | 5.48     | 3.11 | 5.76   | 0.89-11.5 |
| Acy                  | 1.20            | 0.42  | 1.29   | 0.50-1.69  | 0.86     | 0.46 | 0.68   | 0.39-1.84  | 1.76          | 0.83 | 1.65   | 0.29-3.47 | 0.86     | 0.36 | 0.96   | 0.15-1.25 |
| Ace                  | 1.80            | 0.95  | 1.83   | 0.29-2.89  | 2.38     | 1.40 | 2.35   | 0.53-5.41  | 2.64          | 0.90 | 2.85   | 1.00-3.72 | 2.49     | 0.97 | 2.43   | 0.65-3.88 |
| Flu                  | 5.06            | 2.00  | 5.10   | 1.98-8.77  | 3.49     | 2.22 | 2.96   | 1.08-8.85  | 7.91          | 1.71 | 8.00   | 4.58-10.9 | 3.82     | 1.42 | 4.10   | 1.08-5.69 |
| Phe                  | 47.1            | 21.6  | 42.3   | 18.4-78.9  | 17.6     | 12.0 | 12.6   | 5.37-40.5  | 74.2          | 40.8 | 63.3   | 37.5-176  | 17.0     | 9.93 | 14.2   | 4.55-30.4 |
| Ant                  | 4.91            | 2.14  | 4.62   | 1.92-9.02  | 2.41     | 1.76 | 1.60   | 0.73-6.21  | 8.05          | 5.68 | 6.58   | 3.44-22.8 | 5.65     | 11.2 | 1.98   | 0.56-37.1 |
| Flua                 | 31.6            | 17.6  | 31.0   | 11.1-63.4  | 23.9     | 21.2 | 21.1   | 7.01-78.8  | 66.0          | 62.7 | 35.6   | 20.7-225  | 22.7     | 14.1 | 18.2   | 5.37-47.2 |
| Pyr                  | 34.1            | 21.9  | 34.4   | 11.8-83.5  | 26.0     | 20.5 | 23.0   | 7.05-72.56 | 59.8          | 49.2 | 36.4   | 19.9-180  | 23.4     | 14.4 | 19.2   | 6.12-47.1 |
| B[a]A                | 8.82            | 10.5  | 4.76   | 1.18-30.0  | 8.45     | 9.95 | 3.35   | 1.10-31.5  | 10.0          | 8.50 | 5.48   | 3.26-29.9 | 4.53     | 2.64 | 4.27   | 1.40-10.0 |
| Chr                  | 13.6            | 10.93 | 10.8   | 2.99-39.8  | 12.71    | 10.8 | 7.80   | 1.84-31.5  | 29.7          | 24.5 | 16.6   | 9.20-83.1 | 13.8     | 10.5 | 10.6   | 2.28-32.2 |
| B[b]F                | 3.70            | 3.31  | 2.87   | 0.15-10.3  | 4.02     | 3.66 | 2.14   | 0.59-9.33  | 9.01          | 8.44 | 4.80   | 0.77-28.0 | 5.10     | 2.72 | 4.59   | 1.64-9.71 |
| B[k]F                | 0.92            | 1.02  | 0.65   | 0.15-3.00  | 1.14     | 1.06 | 0.65   | 0.25-2.98  | 2.12          | 1.87 | 1.12   | 0.61-6.36 | 1.24     | 0.69 | 1.08   | 0.40-2.31 |
| B[a]P                | 2.01            | 2.41  | 1.16   | 0.15-6.70  | 2.47     | 2.54 | 1.48   | 0.64-8.23  | 2.64          | 1.92 | 1.38   | 0.97-5.45 | 1.68     | 0.72 | 1.69   | 0.83-2.81 |
| D[a,h]A              | 0.27            | 0.24  | 0.15   | 0.15-0.79  | 0.37     | 0.40 | 0.15   | 0.15-1.26  | 2.51          | 0.41 | 0.36   | 0.15-1.38 | 0.37     | 0.19 | 0.35   | 0.15-0.70 |
| InP                  | 1.58            | 1.83  | 0.89   | 0.30-5.55  | 1.85     | 2.30 | 0.87   | 0.31-6.57  | 0.54          | 2.16 | 1.47   | 0.74-7.61 | 1.39     | 0.74 | 1.20   | 0.55-2.44 |
| B[ghi]P              | 1.87            | 1.60  | 1.36   | 0.44-5.03  | 2.08     | 2.24 | 1.24   | 0.39-6.39  | 3.17          | 2.57 | 1.75   | 0.81-8.79 | 1.64     | 0.86 | 1.39   | 0.67-2.88 |
| Σ <sub>16</sub> PAHs | 164.2           | 80.1  | 160    | 56.5-320.9 | 116      | 79.9 | 104    | 36.9-285   | 292           | 207  | 185    | 124-796   | 111      | 67.9 | 87.7   | 27.4-242  |

SD: standard deviation.

**Table S7** Concentrations of OH-PAHs in the hair (ng g<sup>-1</sup> dw)

| Compounds               | Resident (n=10) |      |        |           |          |      |        |           | Worker (n=10) |      |        |           |          |      |        |           |
|-------------------------|-----------------|------|--------|-----------|----------|------|--------|-----------|---------------|------|--------|-----------|----------|------|--------|-----------|
|                         | Internal        |      |        |           | External |      |        |           | Internal      |      |        |           | External |      |        |           |
|                         | Mean            | SD   | Median | Range     | Mean     | SD   | Median | Range     | Mean          | SD   | Median | Range     | Mean     | SD   | Median | Range     |
| 2-OH-Nap                | 120             | 74.8 | 99.1   | 54.0-302  | 7.42     | 7.22 | 5.27   | 1.64-25.7 | 111           | 54.2 | 108    | 36.0-203  | 6.69     | 4.51 | 5.87   | 1.57-12.6 |
| 1-OH-Nap                | 19.7            | 28.4 | 6.35   | 1.27-88.4 | 1.46     | 1.95 | 0.98   | ND-6.28   | 16.2          | 13.8 | 14.3   | 2.60-49.1 | 0.19     | 0.41 | ND     | ND-1.14   |
| 3-OH-Flu                | 8.64            | 11.2 | 5.85   | ND-37.5   | 0.31     | 0.37 | 0.25   | ND-1.06   | 11.2          | 7.33 | 10.5   | 1.36-23.6 | 0.19     | 0.35 | ND     | ND-1.06   |
| 2-OH-Flu                | 11.1            | 9.45 | 8.02   | 4.41-36.0 | 0.46     | 0.53 | 0.28   | 0.13-1.91 | 17.2          | 10.8 | 17.0   | 4.01-33.9 | 0.63     | 0.55 | 0.37   | 0.09-1.64 |
| 2-OH-Phe                | 2.93            | 1.84 | 1.94   | 1.32-6.84 | 0.10     | 0.19 | 0.02   | ND-0.61   | 6.14          | 4.42 | 4.55   | 1.68-15.4 | 0.14     | 0.19 | 0.06   | ND-0.54   |
| 3-OH-Phe                | 3.89            | 2.53 | 2.98   | 1.66-9.34 | 0.12     | 0.21 | 0.02   | ND-0.62   | 7.67          | 5.32 | 6.10   | 2.01-16.6 | 0.19     | 0.22 | 0.13   | ND-0.64   |
| 1/9-OH-Phe              | 2.27            | 2.84 | 1.41   | 0.45-9.98 | 0.04     | 0.07 | 0.02   | 0.02-0.23 | 3.61          | 3.49 | 2.49   | 0.47-11.9 | 0.02     | 0.00 | 0.02   | 0.02-0.03 |
| 4-OH-Phe                | 1.56            | 1.82 | 0.95   | 0.31-6.43 | 0.27     | 0.23 | 0.17   | 0.15-0.92 | 2.04          | 1.91 | 1.43   | 0.56-6.91 | 0.14     | 0.06 | 0.15   | ND-0.21   |
| 1-OH-Pyr                | 1.86            | 2.09 | 0.84   | 0.09-5.56 | 0.11     | 0.08 | 0.09   | ND-0.33   | 2.84          | 2.15 | 2.28   | 0.68-7.21 | 0.94     | 1.65 | ND     | ND-5.10   |
| Σ <sub>10</sub> OH-PAHs | 171             | 128  | 133    | 65.1-500  | 10.3     | 10.5 | 7.87   | 2.04-37.7 | 178           | 87.3 | 168    | 50.7-346  | 9.13     | 6.84 | 7.03   | 2.33-20.0 |

SD: standard deviation.

ND: not detected.

**Table S8** Spearman correlation coefficients between different classes of compound concentrations and lipid content

| Internal (n=20)       |         |         |         |         |         |          |         | External (n=20)       |         |         |         |         |         |          |
|-----------------------|---------|---------|---------|---------|---------|----------|---------|-----------------------|---------|---------|---------|---------|---------|----------|
|                       | 2-rings | 3-rings | 4-rings | 5-rings | 6-rings | Σ16 PAHs | Lipid   |                       | 2-rings | 3-rings | 4-rings | 5-rings | 6-rings | Σ16 PAHs |
| Tri-BDEs              | 0.611** | --      | --      | 0.481*  | --      | --       | --      | Tri-BDEs              | --      | --      | --      | --      | --      | --       |
| Tetra-BDEs            | 0.696** | 0.702** | 0.577** | 0.574** | 0.505*  | 0.568**  | 0.589** | Tetra-BDEs            | --      | --      | --      | --      | --      | --       |
| Penta-BDEs            | 0.756** | 0.689** | 0.498*  | 0.565** | 0.483*  | 0.522*   | 0.651** | Penta-BDEs            | --      | --      | --      | --      | --      | --       |
| Hexa-BDEs             | 0.794** | 0.664** | 0.464*  | 0.580** | 0.479*  | 0.516*   | 0.660** | Hexa-BDEs             | --      | --      | --      | --      | --      | --       |
| Hepta-BDEs            | 0.735** | 0.591** | 0.391   | 0.559*  | --      | 0.472*   | 0.691** | Hepta-BDEs            | --      | --      | --      | --      | --      | --       |
| Octa-BDEs             | 0.747** | 0.737** | 0.499*  | 0.644** | 0.527*  | 0.574**  | 0.781** | Octa-BDEs             | --      | --      | --      | 0.447*  | --      | --       |
| Nona-BDEs             | 0.764** | 0.680** | 0.505*  | 0.573** | 0.447*  | 0.529*   | 0.800** | Nona-BDEs             | --      | --      | --      | --      | --      | --       |
| Deca-BDEs             | 0.786** | 0.683** | 0.465*  | 0.516*  | --      | 0.490*   | 0.803** | Deca-BDEs             | --      | --      | --      | --      | --      | --       |
| Σ <sub>20</sub> PBDEs | 0.786** | 0.687** | 0.534*  | 0.567** | 0.475*  | 0.547*   | 0.715** | Σ <sub>20</sub> PBDEs | --      | --      | --      | --      | --      | --       |
| Lipid                 | 0.663** | 0.557*  | 0.529*  | 0.549*  | 0.476*  | 0.575**  | 1       |                       |         |         |         |         |         |          |

--. No significant correlation.

\*\* . Correlation is significant at the 0.01 level (2-tailed).

\* . Correlation is significant at the 0.05 level (2-tailed).

**Table S9** Spearman correlation coefficients between OH-PAHs and the two parent compounds

|                       | Internal (n=20) |         |         |         |          | External (n=20)       |         |         |         |          |         |
|-----------------------|-----------------|---------|---------|---------|----------|-----------------------|---------|---------|---------|----------|---------|
|                       | OH-Nap          | OH-Flu  | OH-Phe  | OH-Pry  | ΣOH-PAHs | OH-Nap                | OH-Flu  | OH-Phe  | OH-Pry  | ΣOH-PAHs |         |
| Tri-BDEs              | —               | —       | 0.465*  | —       | —        | Tri-BDEs              | —       | —       | —       | —        |         |
| Tetra-BDEs            | —               | 0.547*  | 0.570** | —       | —        | Tetra-BDEs            | —       | —       | —       | —        |         |
| Penta-BDEs            | —               | 0.445*  | 0.504*  | —       | —        | Penta-BDEs            | —       | —       | —       | —        |         |
| Hexa-BDEs             | —               | 0.463*  | 0.545*  | 0.493*  | —        | Hexa-BDEs             | —       | —       | —       | —        |         |
| Hepta-BDEs            | —               | —       | 0.487*  | 0.495*  | —        | Hepta-BDEs            | —       | —       | —       | —        |         |
| Octa-BDEs             | —               | —       | —       | —       | —        | Octa-BDEs             | —       | —       | —       | —        |         |
| Nona-BDEs             | —               | 0.460*  | 0.570** | —       | —        | Nona-BDEs             | —       | —       | —       | —        |         |
| Deca-BDEs             | —               | 0.481*  | 0.571** | 0.449*  | —        | Deca-BDEs             | —       | —       | —       | —        |         |
| Σ <sub>20</sub> PBDEs | —               | —       | 0.564** | 0.461*  | —        | Σ <sub>20</sub> PBDEs | —       | —       | —       | —        |         |
| 2-rings               | —               | —       | —       | —       | —        | 2-rings               | 0.450*  | 0.563** | 0.555*  | --       | 0.496*  |
| 3-rings               | 0.474*          | 0.612** | 0.672** | 0.571** | 0.632**  | 3-rings               | 0.782** | 0.671** | 0.761** | 0.606**  | 0.806** |
| 4-rings               | —               | 0.592** | 0.818** | 0.738** | 0.598**  | 4-rings               | 0.586** | 0.560*  | 0.810** | 0.513*   | 0.636** |
| 5-rings               | —               | 0.462*  | 0.737** | 0.723** | 0.454*   | 5-rings               | —       | —       | 0.593** | —        | —       |
| 6-rings               | —               | 0.446*  | 0.707** | 0.670** | 0.514*   | 6-rings               | —       | —       | 0.660** | —        | —       |
| Σ <sub>16</sub> PAHs  | —               | 0.586** | 0.811** | 0.774** | 0.583**  | Σ <sub>16</sub> PAHs  | 0.626** | 0.599** | 0.834** | 0.512*   | 0.674** |
| lipid                 | —               | —       | —       | —       | —        |                       |         |         |         |          |         |

--. No significant correlation.

\*\* . Correlation is significant at the 0.01 level (2-tailed).

\* . Correlation is significant at the 0.05 level (2-tailed).
